# Supplementary material for: Upwelling-induced trace gas dynamics in the Baltic Sea inferred from 8 years of autonomous measurements on a ship of opportunity
Source: Copernicus journal article supplement (doi:10.5194/bg-18-2679-2021), 2021-04-30
Supplement: Supplementary file 1 [file bg-18-2679-2021-supplement.zip]

**Animation S1.** Daily means of sea surface temperature in the Baltic Sea from 1 to 31 August 2016 as extracted from (a) the model and (b) the remote sensing product. The colour scale is identical to that of Fig. 3. Please refer to Sect. 2.2 for a detailed description of the underlying data.
