# Supplementary material for: Upwelling-induced trace gas dynamics in the Baltic Sea inferred from 8 years of autonomous measurements on a ship of opportunity
Source: Copernicus journal article supplement (doi:10.5194/bg-18-2679-2021), 2021-04-30
Supplement: Supplementary file 2 [file bg-18-2679-2021-supplement.zip]

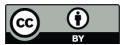

*Supplement of*

**Upwelling-induced trace gas dynamics in the Baltic Sea inferred from 8 years of autonomous measurements on a ship of opportunity**

**Erik Jacobs et al.**

*Correspondence to:* Erik Jacobs ([erik.jacobs@io-warnemuende.de](mailto:erik.jacobs@io-warnemuende.de))

- [bg-18-2679-2021-supplement-title-page.pdf](#)
- [S1\\_Animation\\_SST\\_Aug2016.gif](#)
- [Supplement\\_Jacobs\\_Upwelling.pdf](#)

The copyright of individual parts of the supplement might differ from the article licence.
