# Supplementary material for: Upwelling-induced trace gas dynamics in the Baltic Sea inferred from 8 years of autonomous measurements on a ship of opportunity
Source: Copernicus journal article supplement (doi:10.5194/bg-18-2679-2021), 2021-04-30
Supplement: Supplementary file 3 [file bg-18-2679-2021-supplement.zip]

Archive with 3 entries (3 files):
- Supplement_Jacobs_Upwelling.pdf
- S1_Animation_SST_Aug2016.gif
- bg-18-2679-2021-supplement-title-page.pdf
