# Supplementary figures and images for: Upwelling-induced trace gas dynamics in the Baltic Sea inferred from 8 years of autonomous measurements on a ship of opportunity
Source: Copernicus journal article supplement (doi:10.5194/bg-18-2679-2021), 2021-04-30

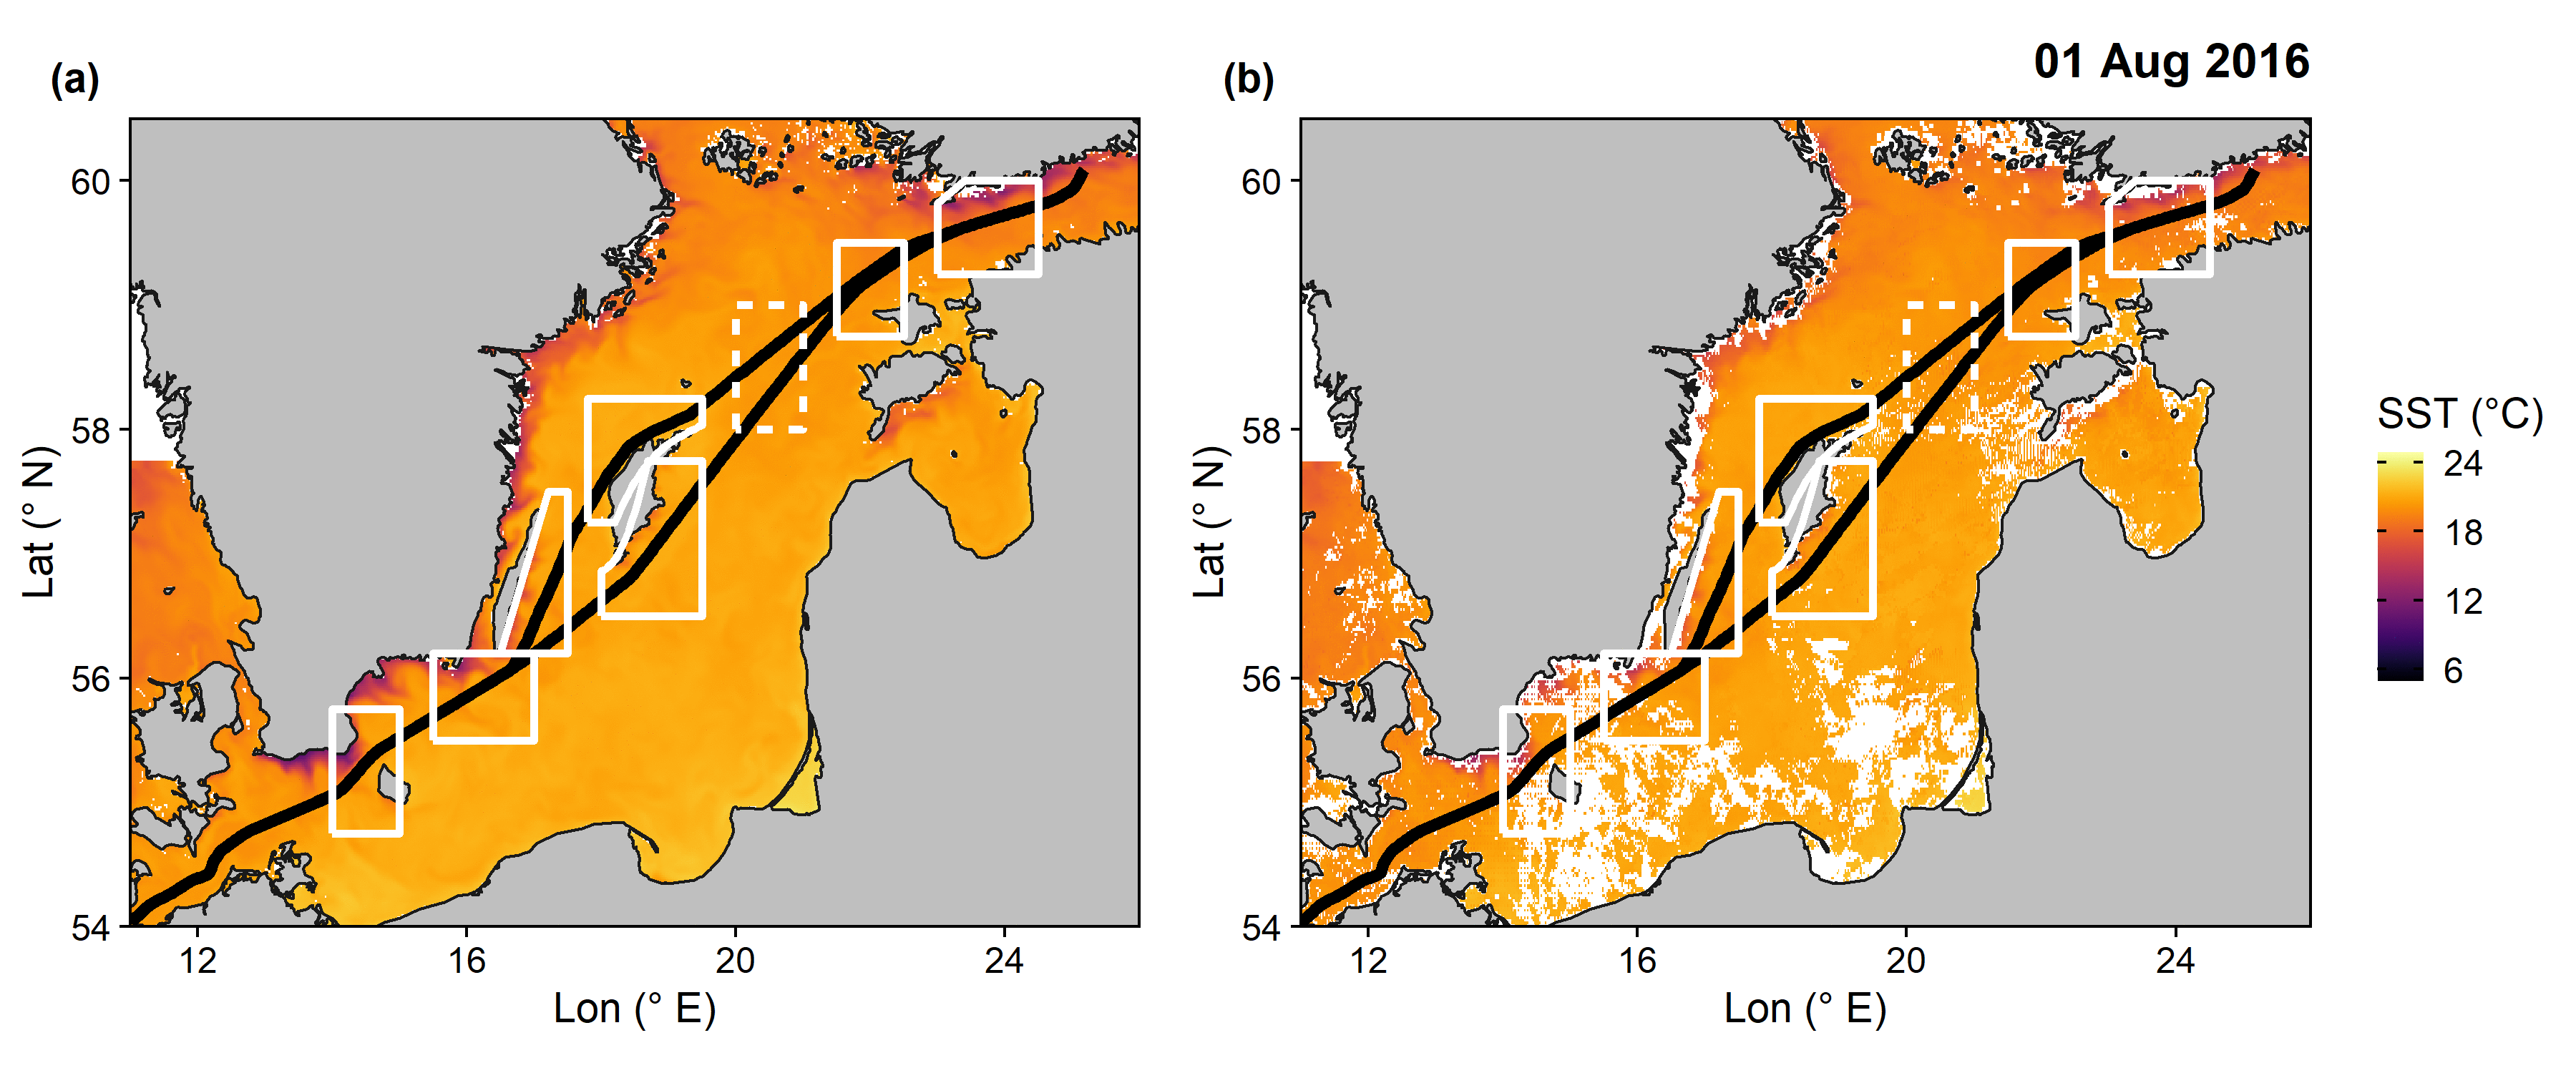

Supplement: Supplementary file 3 [file bg-18-2679-2021-supplement.zip › S1_Animation_SST_Aug2016.gif]
